# Supplementary material
Source: publisher site journal article supplement (https://www.dovepress.com/article/497975)
Supplement: Supplementary file 1 [file get_supplementary_file.php]

**A**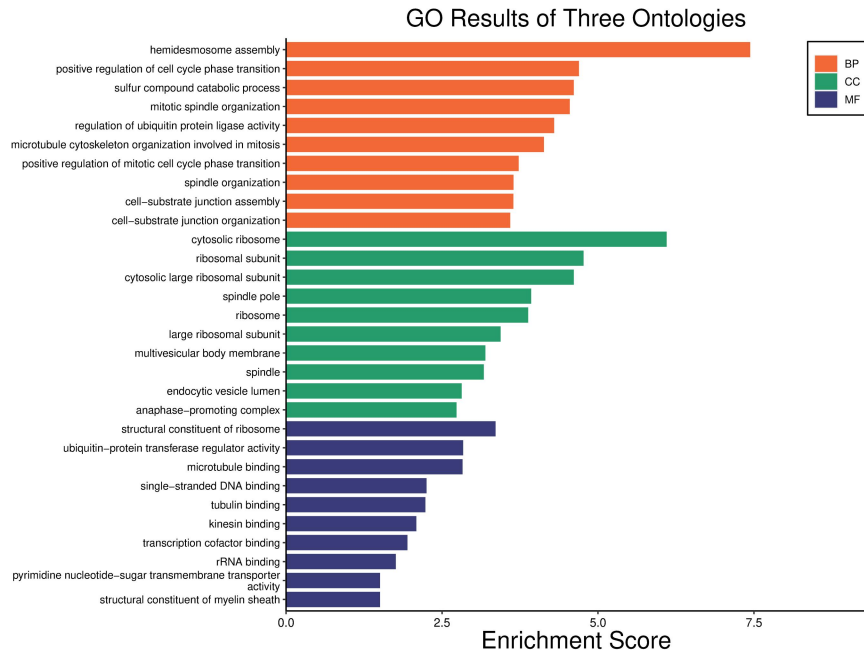**B**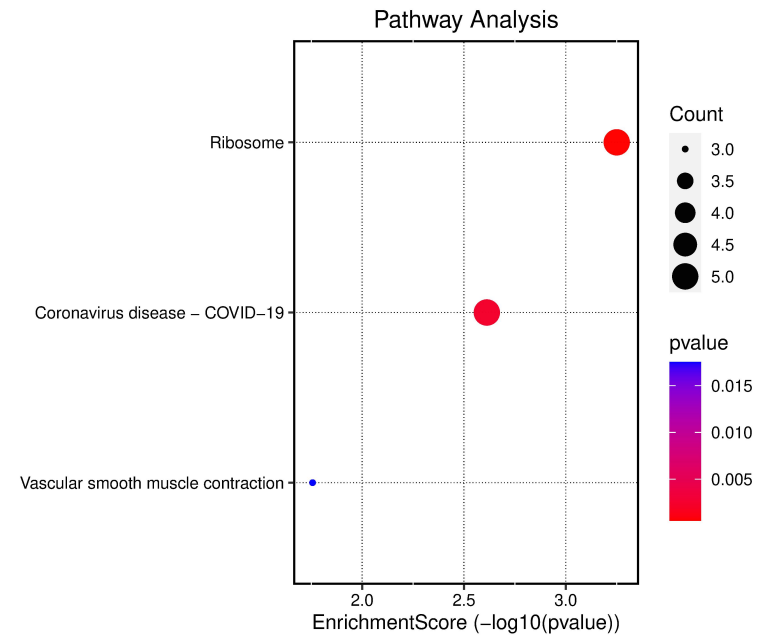

**Supplementary Figure 1** GO and KEGG biological analysis were performed for DEGs. (A), The GO biological analysis among DEGs. (B), The KEGG biological analysis among DEGs.

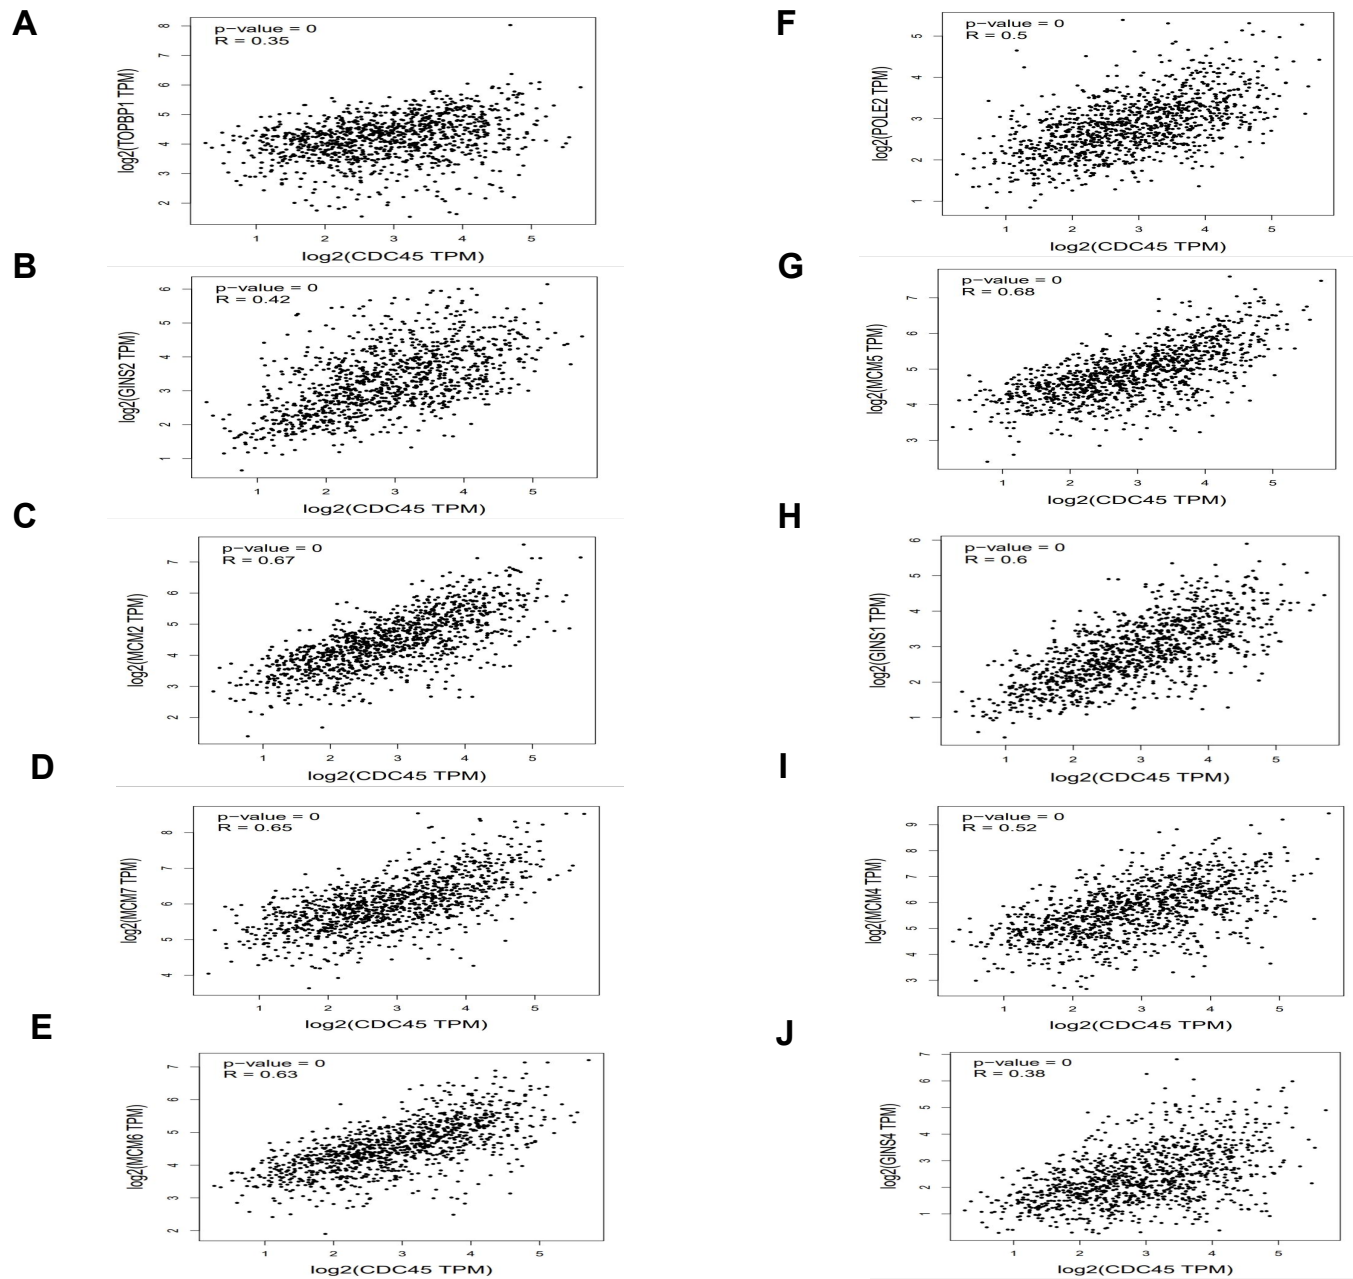

**Supplementary Figure 2** The correlation coefficient between CDC45 and associated genes (A-J).

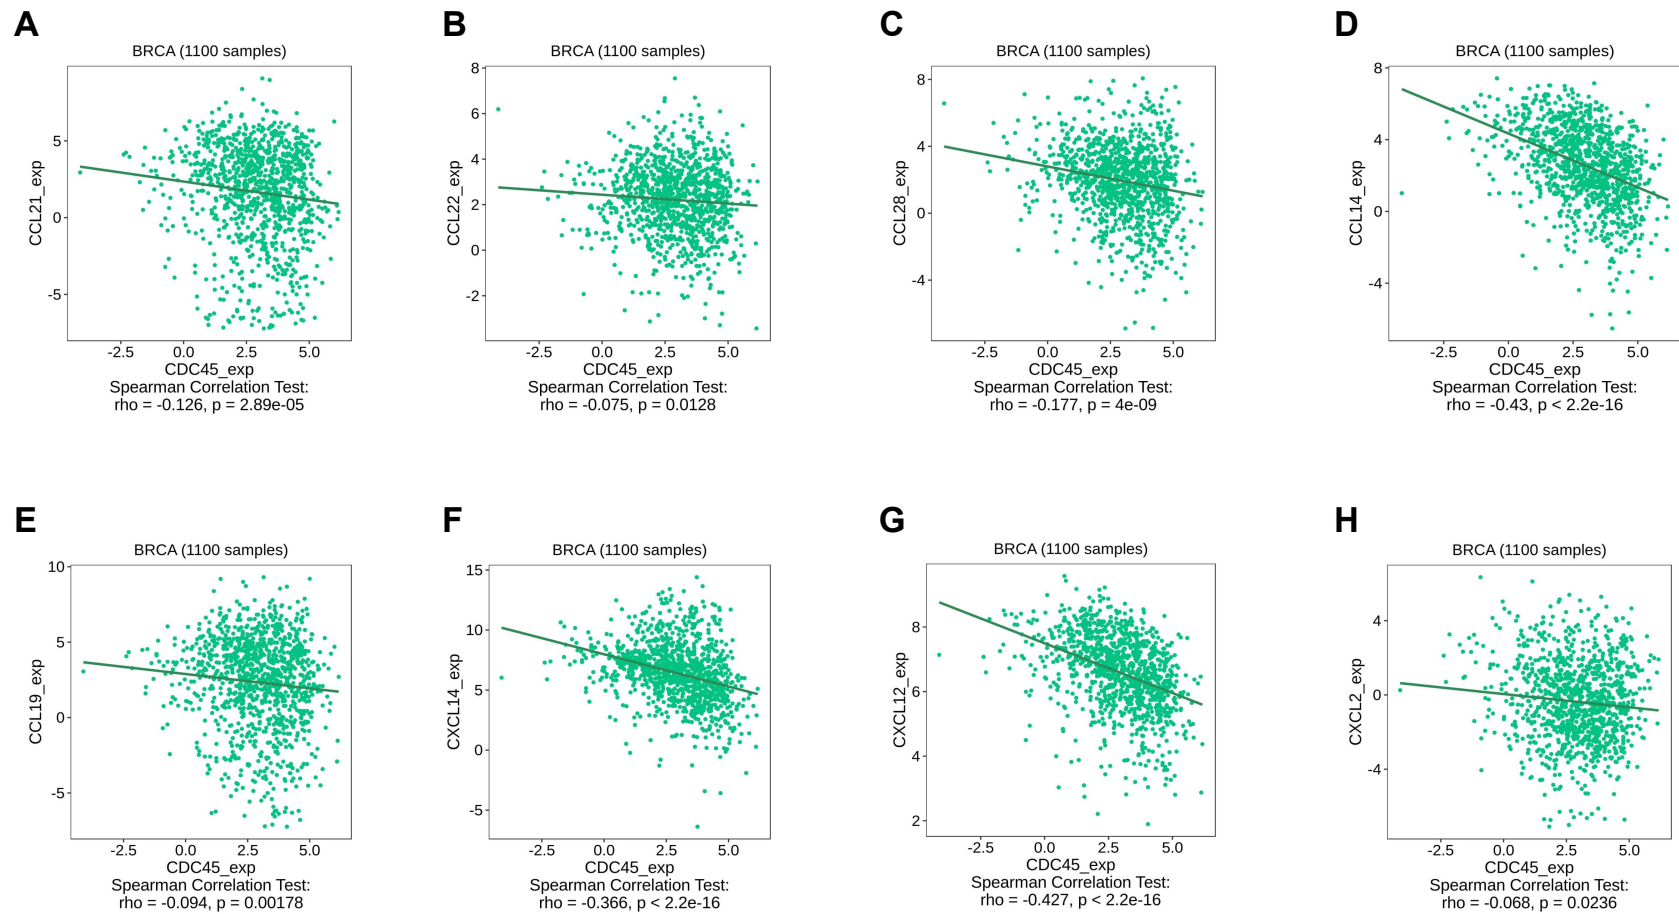

**Supplementary Figure 3** The exploration of chemokines negatively correlated with the expression level of CDC45 (A-H).

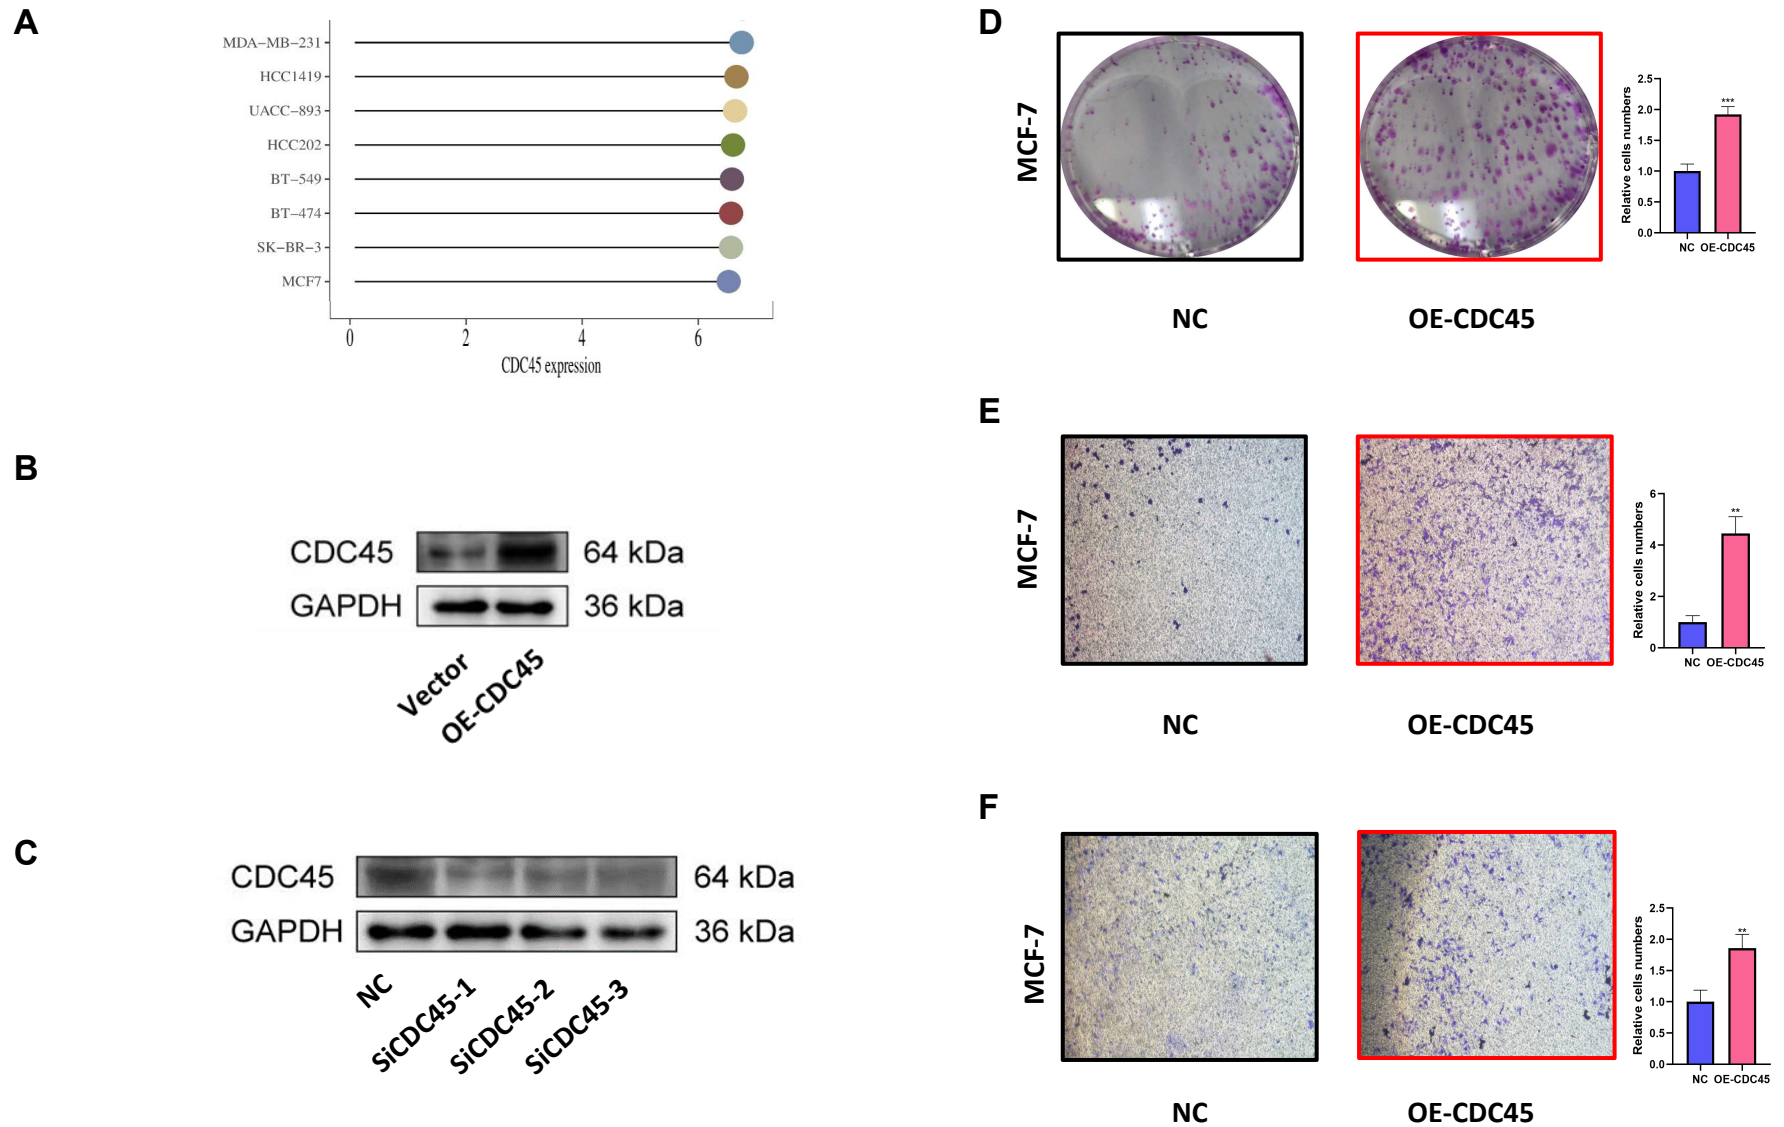

**Supplementary Figure 4** Functional experiments and molecular mechanism exploration of over-expression CDC45.(A) , Expression levels of CDC45 in different breast cancer cell lines. (B-C) , The over-expression and knockdown efficiency verification of CDC45 by westernblot assay.(D) , The over-expression of CDC45 in MCF7 cells verified by clone formation.(E-F) , The over-expression of CDC45 in MCF7 cells verified by migration and invasion experiments.(\*\*P < 0.01, \*\*\*P < 0.001).
